# Supplementary material for: A two-dimensional lead-free double perovskite for self-powered and high performance X-ray detection
Source: Royal Society of Chemistry journal article supplement (doi:10.1039/d4tc03465a), 2024-01-01
Supplement: d4tc03465a1.pdf [file d4tc03465a1.pdf]

## **Two-Dimensional Lead-Free Double Perovskite for Self-powered and High Performance X-Ray Detection**

Yongqiang Zhou<sup>a</sup>, Lei Huang<sup>a</sup>, Mengyue Wu<sup>a</sup>, Faguang Kuang<sup>d</sup>, Kang An<sup>b</sup>, Peng Feng<sup>b</sup>, Peng He<sup>b,\*</sup>, Yayun Pu<sup>a,\*</sup>, Jun'an Lai<sup>b,\*</sup>, Xiaosheng Tang<sup>a,b,c,\*</sup>

<sup>a</sup> College of Optoelectronic Engineering, Chongqing University of Posts and Telecommunications, Chongqing, 400065, China.

<sup>b</sup> Key Laboratory of Optoelectronic Technology & Systems (Ministry of Education), College of Optoelectronic Engineering, Chongqing University, Chongqing 400044, China.

<sup>c</sup> School of Materials Science and Engineering, Zhengzhou University, Zhengzhou 450001, China.

<sup>d</sup> Key Laboratory of Human Brain bank for Functions and Diseases of Department of Education of Guizhou Province, College of Basic Medical, Guizhou Medical University, Guiyang 550025, China

**\* Corresponding author**

E-mail: [penghe@cqu.edu.cn](mailto:penghe@cqu.edu.cn) (P. He), [puvy@cqupt.edu.cn](mailto:puvy@cqupt.edu.cn) (Y.Y. Pu),  
[ja.lai@cqu.edu.cn](mailto:ja.lai@cqu.edu.cn) (J. Lai), [xstang@cqu.edu.cn](mailto:xstang@cqu.edu.cn) (X.S. Tang)

## Experimental section

### *Chemical*

Histamine dihydrochloride ( $C_5H_{11}Cl_2N_3$ , 99.999%), Silver chloride (AgCl, 99.95%), bismuth trioxide ( $Bi_2O_3$ , 99%), Hypophosphorous acid ( $H_3PO_2$ , 99.99%), Hydrobromic acid (HBr, 99.98%). All reagents are purchased from Adamas. All materials are commercially available and can be used without purification. Indium tin oxide coated glass (ITO glass) is bought from Yiyang South China Xiangcheng Technology Co., Ltd.

### *Synthesis of $(HA)_2AgBiBr_8$ Single Crystals*

1.5 mmol of HAcI (Histamine dihydrochloride,  $C_5H_{11}Cl_2N_3$ ), 1.5 mmol of AgCl, and 0.75 mmol  $Bi_2O_3$  are hydrochloride in a mixture of 10 ml HBr and 2 ml  $H_2PO_2$ . It is then placed on a heating plate and stirred for 80°C until completely dissolved, after which the solution is transferred to an absolutely clean lining. Set oven parameters Set the oven temperature to 180°C, heating time for 4 h, then heat for 2 h, then cool down to room temperature, cooling time for 4 h, then heat up to 180°C, heat preservation for 2h, 180°C cooling to 100°C for 72 h, 100°C cooling to 20°C for 72 h, heat preservation to 20°C for 5h. Finally, the synthesized crystal is filtered out, washed with acetone (slightly soluble or insoluble and volatile solvent), and vacuumed for preservation.

### *Device Preparation*

Before device fabrication, the  $(HA)_2AgBiBr_8$  was cleaned three times with anhydrous ether, and then dried at 60 °C under a vacuum oven for 24 h. The  $(HA)_2AgBiBr_8$  X-ray detector was made by depositing interdigital Ag electrodes ( $\approx 150$  nm thickness) via vacuum evaporation.

### *Physical Characterization*

The powder X-ray diffraction measurements (PXRD) were performed on PANalytical X'Pert Powder diffractometer. During the measurement, the Bragg's diffraction angle ( $2^\circ$ ) range was set to  $10^\circ - 80^\circ$  and scanning time is 20 min. Scanning electron microscopy (SEM) images were taken using Quattro S. Cold FE-SEM, Hitach

High-Technologies with an acceleration voltage of 10 KV, and EDX was used to characterize the elements of doping samples. Pure  $(\text{HA})_2\text{AgBiBr}_8$  was scanned by ZEISS GeminiSEM 300 field emission scanning electron microscope, and all elements were characterized by energy dispersive spectroscopy (EDS). The UV-Vis transmission spectra and absorption spectra were recorded with UV-3600 spectrophotometer (Shimadzu, Japan) in the wavelength range of 200 to 800 nm. The thermogravimetric analysis of crystals was performed by TGA/DSC1/1600LF (Mettler Toledo, Switzerland) at a heating rate of 20 °C/min up to 800 °C. The DFT calculation was performed on the Cambridge Sequential Total Energy Package (CASTEP) module.

X-ray Detection: The I–V traces and I–t curves under X-ray irradiation were also recorded using the 6517B high-precision electrometer (Keithley, USA). A commercially available Ag target X-ray tube with photons energies as high as 50 KeV and peak intensity at 20 KeV was used as X-ray source (4 W, Mini-X2, Amptek, USA). The dose rate of the X-ray tube can be modulated via adjusting its tube current and measured using a commercial X-ray dosimeter (Accu-Gold, Radcal, USA) attached to the ion chamber (10X 6-180 model) in an integrating mode.

The optical band gap can be calculated by the following formula:<sup>1</sup>

$$(hvF(A))^{\frac{1}{n}} = A(hv - E_g) \quad (1)$$

Where  $F(A)$  is the absorption coefficient,  $h\nu$  is the photon energy,  $A$  is the proportionality constant, and  $E_g$  is the optical band gap.

## Supplementary data section

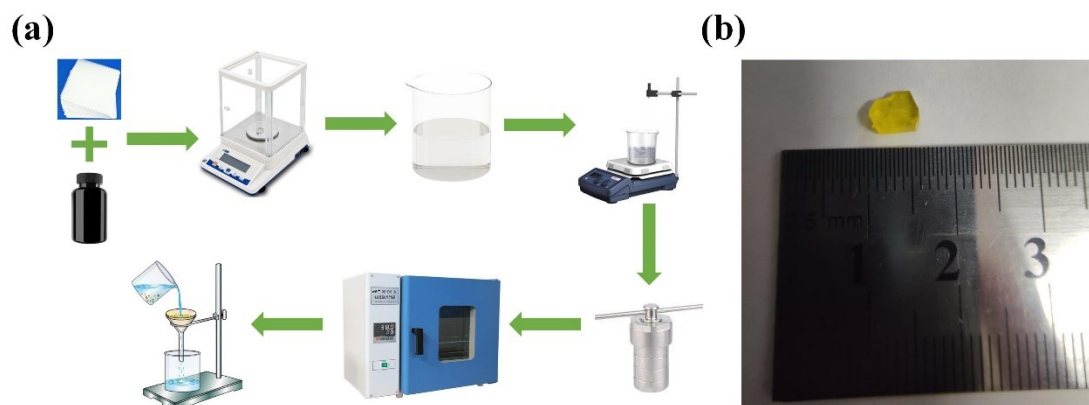

**Figure S1.** (a) Schematic diagram of preparing  $(\text{HA})_2\text{AgBiBr}_8$  crystal by hydrothermal method. (b) shows the growth of  $(\text{HA})_2\text{AgBiBr}_8$  crystal.

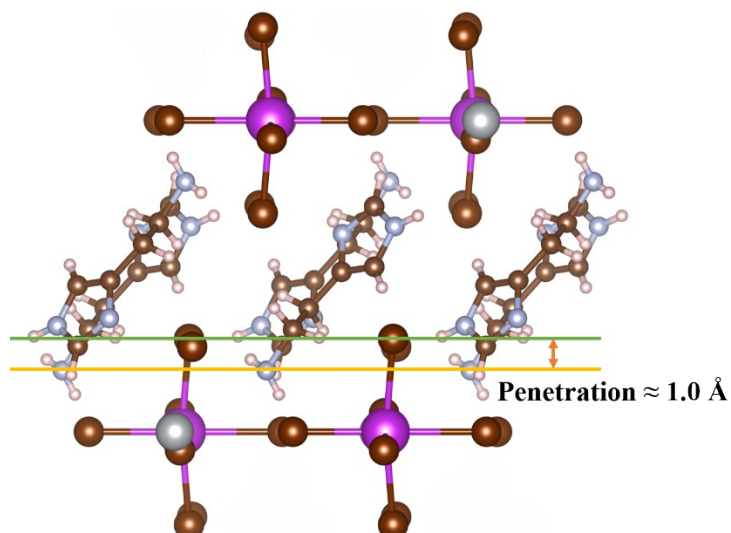

**Figure S2.** The distance between N atom in organic cation and terminal Br atom in inorganic layer (penetration depth).

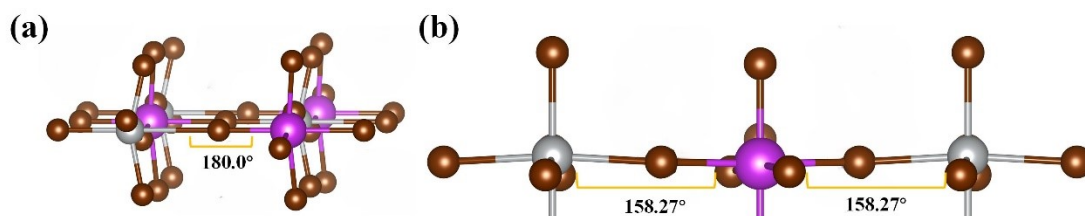

**Figure S3.** Equatorial Sb-Br-Ag bond angles of  $(\text{HA})_2\text{AgBiBr}_8$ .

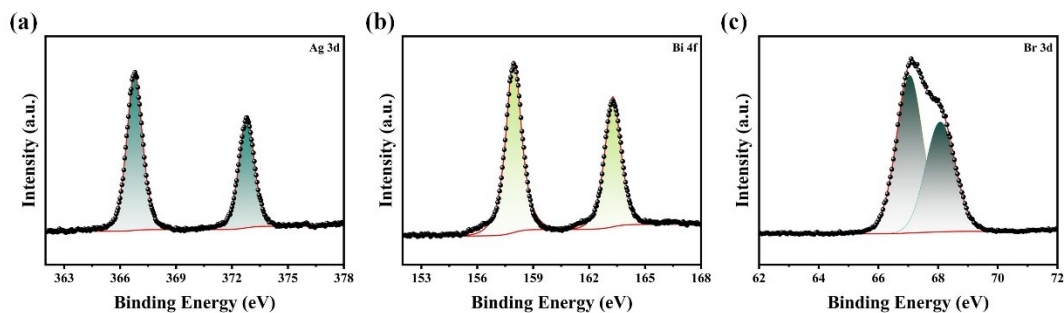

**Figure S4.** High resolution scans of (b) Ag, (c) Bi, (d)Br. All elements are in the expected valence states.

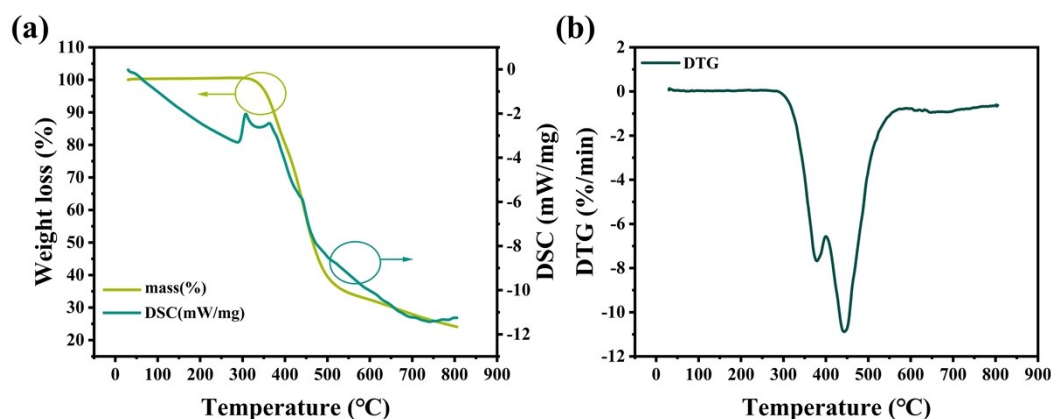

**Figure S5.** (a-b) Thermogravimetric analysis (TGA), Differential scanning calorimeter (DSC) and Derivative thermogravimetry (DTG) analysis of  $(\text{HA})_2\text{AgBiBr}_8$  powder under  $\text{N}_2$  flowing atmosphere using a ramp rate of  $20^\circ\text{C}/\text{min}$  from  $30$  to  $800^\circ\text{C}$ .

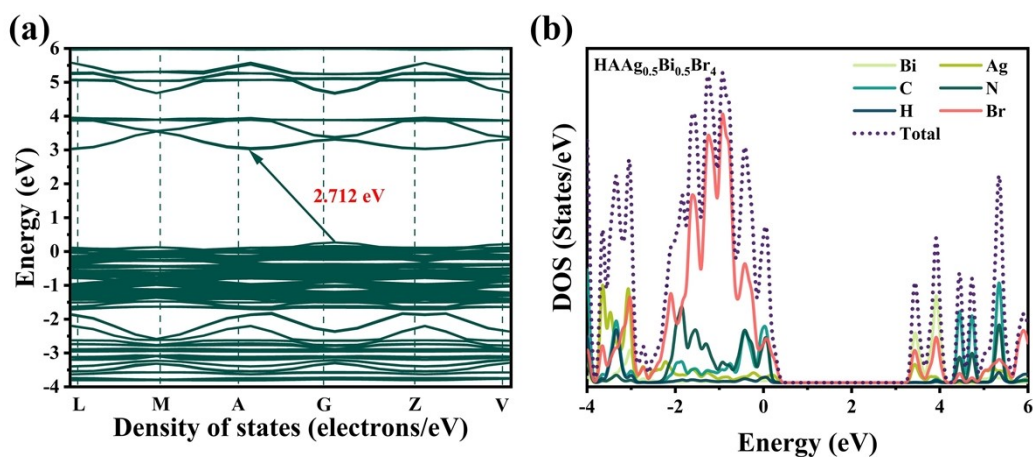

**Figure S6.** (a) Band structures for  $(\text{HA})_2\text{AgBiBr}_8$ . (b) is the Total and projected density of states (DOS) of the states of  $(\text{HA})_2\text{AgBiBr}_8$ .

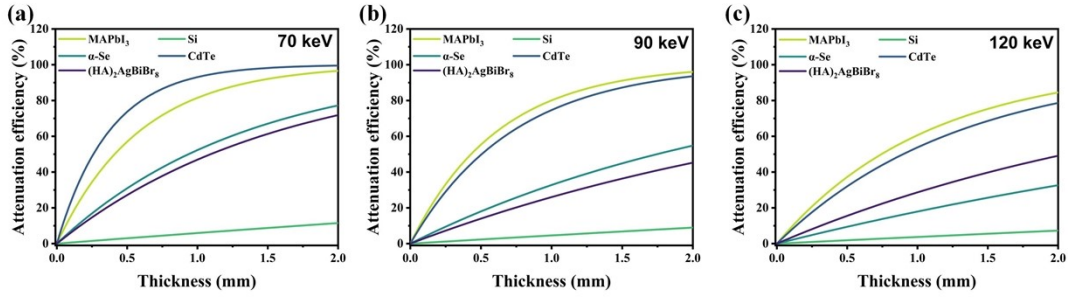

**Figure S7.** Attenuation efficiency of 70 KeV, 90KeV and 120KeV X-ray photons under different thicknesses for (HA)<sub>2</sub>AgBiBr<sub>8</sub>, Si, α-Se, CdTe and MAPbI<sub>3</sub>.

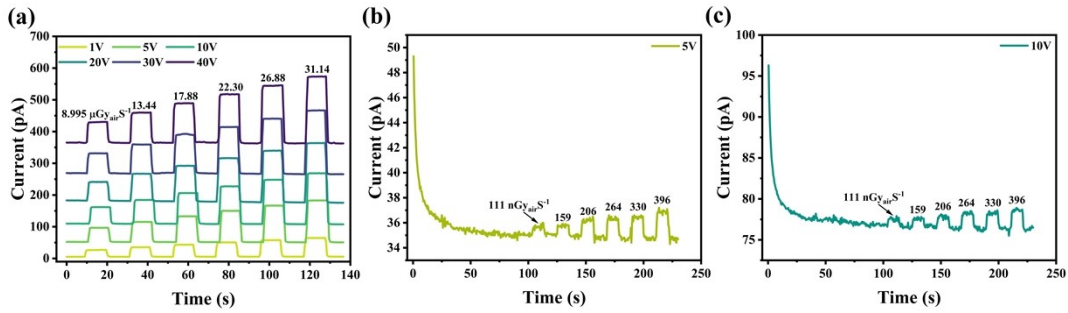

**Figure S8.** On/off photocurrent response of the (HA)<sub>2</sub>AgBiBr<sub>8</sub> X-ray detector under different dose rates and at different bias voltage.

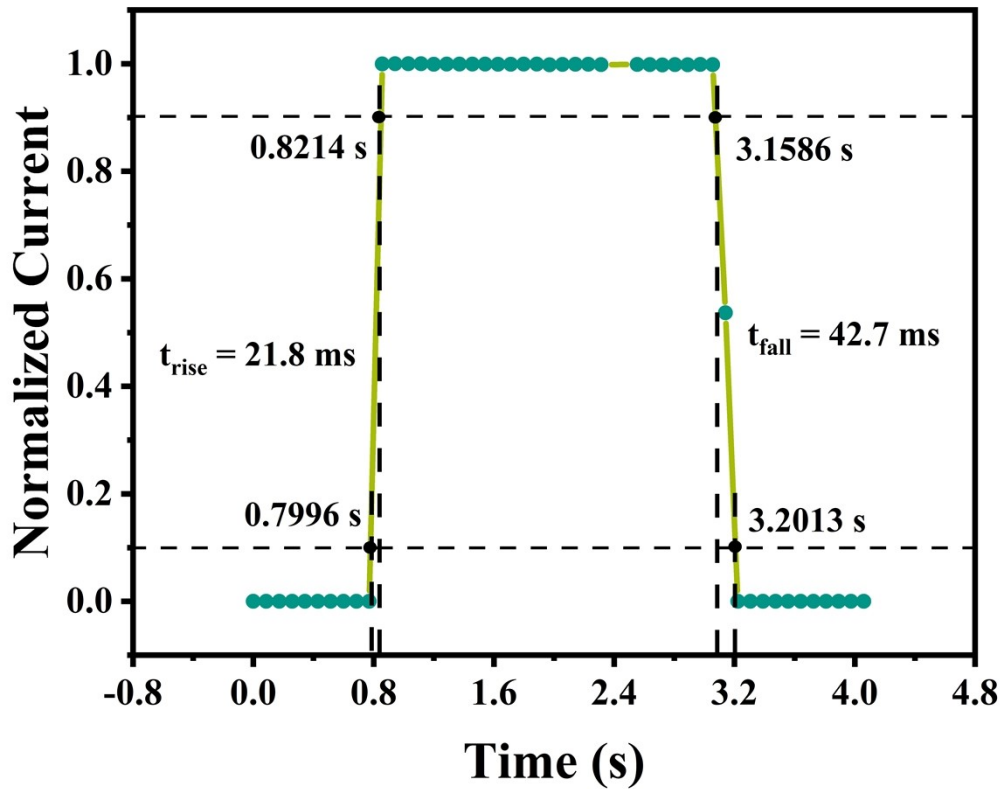

**Figure S9.** Rise and fall times of single-crystal (HA)<sub>2</sub>AgBiBr<sub>8</sub> device.

**Table S1.** Single crystal X-ray diffraction data of (HA)<sub>2</sub>AgBiBr<sub>8</sub> single crystals.

| Compound                           | (HA) <sub>2</sub> AgBiBr <sub>8</sub>                                                            |
|------------------------------------|--------------------------------------------------------------------------------------------------|
| Empirical formula                  | C <sub>5</sub> H <sub>9</sub> Ag <sub>0.5</sub> Bi <sub>0.5</sub> Br <sub>4</sub> N <sub>3</sub> |
| Formula weight                     | 589.186                                                                                          |
| Temperature/K                      | 200.15                                                                                           |
| Crystal system                     | monoclinic                                                                                       |
| space group                        | C2/c                                                                                             |
| a/Å                                | 11.5526(5)                                                                                       |
| b/Å                                | 12.1920(6)                                                                                       |
| c/Å                                | 18.6749(9)                                                                                       |
| α/°                                | 90                                                                                               |
| β/°                                | 94.729(4)                                                                                        |
| γ/°                                | 90                                                                                               |
| Volume/Å <sup>3</sup>              | 2621.39(19)                                                                                      |
| Z                                  | 8                                                                                                |
| μ/mm <sup>-1</sup>                 | 19.652                                                                                           |
| F(000)                             | 2097.7                                                                                           |
| ρ <sub>calc</sub> /cm <sup>3</sup> | 2.986                                                                                            |

**Table S2.** Bond Angles for (HA)<sub>2</sub>AgBiBr<sub>8</sub>.

| Atom              | Atom | Atom              | Angle/°   | Atom              | Atom | Atom              | Angle/°   |
|-------------------|------|-------------------|-----------|-------------------|------|-------------------|-----------|
| Br04 <sup>1</sup> | Bi01 | Br04 <sup>2</sup> | 178.16(6) | Br04 <sup>3</sup> | Ag02 | Br03              | 90.78(4)  |
| Br05              | Bi01 | Br04 <sup>1</sup> | 90.92(3)  | Br04              | Ag02 | Br03              | 88.03(4)  |
| Br05              | Bi01 | Br04 <sup>2</sup> | 90.92(3)  | Br04              | Ag02 | Br04 <sup>3</sup> | 173.95(8) |
| Br06              | Bi01 | Br04 <sup>2</sup> | 89.08(3)  | Br05              | Ag02 | Br03              | 101.41(5) |
| Br06              | Bi01 | Br04 <sup>1</sup> | 89.08(3)  | Br05              | Ag02 | Br03 <sup>3</sup> | 101.41(5) |
| Br06              | Bi01 | Br05              | 180.0     | Br05              | Ag02 | Br04              | 93.02(4)  |
| Br07 <sup>3</sup> | Bi01 | Br04 <sup>2</sup> | 90.71(4)  | Br05              | Ag02 | Br04 <sup>3</sup> | 93.02(4)  |
| Br07 <sup>3</sup> | Bi01 | Br04 <sup>1</sup> | 89.43(4)  | Ag02 <sup>3</sup> | Br04 | Bi01 <sup>4</sup> | 158.27(6) |

|                   |      |                   |           |      |      |      |           |
|-------------------|------|-------------------|-----------|------|------|------|-----------|
| Br07              | Bi01 | Br04 <sup>1</sup> | 90.71(4)  | Ag02 | Br05 | Bi01 | 180.0     |
| Br07              | Bi01 | Br04 <sup>2</sup> | 89.43(4)  | C00F | N008 | C00B | 109.2(12) |
| Br07 <sup>3</sup> | Bi01 | Br05              | 85.51(3)  | C00F | N00A | C00D | 108.9(12) |
| Br07              | Bi01 | Br05              | 85.51(3)  | C00D | C00B | N008 | 106.0(12) |
| Br07              | Bi01 | Br06              | 94.49(3)  | C00E | C00B | N008 | 120.4(11) |
| Br07 <sup>3</sup> | Bi01 | Br06              | 94.49(3)  | C00E | C00B | C00D | 133.6(13) |
| Br07 <sup>3</sup> | Bi01 | Br07              | 171.02(7) | C00E | C00C | N009 | 111.5(11) |
| Br07 <sup>3</sup> | Ag02 | Br03              | 157.19(9) | C00B | C00D | N00A | 107.8(13) |
| Br04              | Ag02 | Br03 <sup>3</sup> | 90.78(4)  | C00C | C00E | C00B | 111.4(11) |
| Br04 <sup>3</sup> | Ag02 | Br03 <sup>3</sup> | 88.03(4)  | N00A | C00F | N008 | 107.9(14) |

**Table S3.** The chemical composition data measured by EDS of (HA)<sub>2</sub>AgBiBr<sub>8</sub> crystal.

| Element | Line Type | Wt%    | Atomic percent |
|---------|-----------|--------|----------------|
| C       | K         | 9.97%  | 42.28%         |
| N       | K         | 3.40%  | 12.35%         |
| Br      | L         | 54.35% | 34.64%         |
| Ag      | L         | 12.56% | 5.93%          |
| Bi      | M         | 19.72% | 4.81%          |
| Total   |           | 100%   | 100%           |

**Table S4.** Comparison of important X-ray parameters of different materials.

| Type      | Material                                                            | Sensitivity<br>( $\mu\text{CGy}_{\text{air}}^{-1}\text{m}^{-2}$ ) | Electric Field<br>(V/mm) | $\mu\tau$ -product<br>( $\text{cm}^2\text{V}^{-1}$ ) | detection limit<br>( $\mu\text{Gy}_{\text{air}}\text{s}^{-1}$ ) | Ref.             |
|-----------|---------------------------------------------------------------------|-------------------------------------------------------------------|--------------------------|------------------------------------------------------|-----------------------------------------------------------------|------------------|
| RP        | (CPA) <sub>4</sub> AgBiBr <sub>8</sub>                              | 0.8                                                               | 10                       | $1 \times 10^{-3}$                                   | -                                                               | 2                |
| RP        | (PMA) <sub>2</sub> PbI <sub>4</sub>                                 | 283                                                               | 555.6                    | $8.05 \times 10^{-3}$                                | 2.13                                                            | 3                |
| DJ        | (3AP)PbBr <sub>4</sub>                                              | 348.6                                                             | 10                       | $2.61 \times 10^{-3}$                                | 3.04                                                            | 4                |
| DJ        | BDAPbI <sub>4</sub>                                                 | 242                                                               | 310                      | $4.43 \times 10^{-4}$                                | 0.43                                                            | 5                |
| RP        | (I-BA) <sub>4</sub> AgBiI <sub>8</sub>                              | 5.38                                                              | -                        | $2.28 \times 10^{-3}$                                | 500                                                             | 6                |
| RP        | (DFPIP) <sub>4</sub> AgBiI <sub>8</sub>                             | 188                                                               | -                        | $1.1 \times 10^{-5}$                                 | 3.13                                                            | 7                |
| RP        | (BA) <sub>2</sub> (MA) <sub>2</sub> Pb <sub>3</sub> I <sub>10</sub> | 13                                                                | 0                        | -                                                    | -                                                               | 8                |
| RP        | (BA) <sub>2</sub> PbI <sub>4</sub>                                  | 1.48                                                              | 10                       | $4.5 \times 10^{-3}$                                 | 0.241                                                           | 9                |
| RP        | (BA) <sub>2</sub> CsAgBiBr <sub>7</sub>                             | 4.2                                                               | 5                        | $1.21 \times 10^{-3}$                                | 70.5                                                            | 10               |
| <b>DJ</b> | <b>(HA)<sub>2</sub>AgBiBr<sub>8</sub></b>                           | <b>252.38</b>                                                     | <b>24.84</b>             | <b><math>2.047 \times 10^{-3}</math></b>             | <b>0.0689</b>                                                   | <b>This work</b> |



**Table S5.** Response time and self-powering capability for reported perovskite-based X-ray detectors.

| Material                                                | Response time       | self-powering capability | Ref.             |
|---------------------------------------------------------|---------------------|--------------------------|------------------|
| (4ABA)PbI <sub>4</sub>                                  | 110/190 ms          | No                       | 11               |
| (1,3-BMACH)PbBr <sub>4</sub>                            | -                   | Yes                      | 12               |
| CsPbBr <sub>3</sub> QDs film                            | 30/27 ms            | No                       | 13               |
| MA <sub>3</sub> Bi <sub>2</sub> I <sub>9</sub>          | 23.3/31.4 ms        | No                       | 14               |
| (AMP)(MA)Pb <sub>2</sub> I <sub>7</sub>                 | 40/40 ms            | Yes                      | 15               |
| BA <sub>2</sub> PbBr <sub>4</sub>                       | 307/98 ms           | No                       | 16               |
| (BDA)(EA) <sub>2</sub> Pb <sub>3</sub> Br <sub>10</sub> | -                   | Yes                      | 17               |
| <b>(HA)<sub>2</sub>AgBiBr<sub>8</sub></b>               | <b>21.8/42.7 ms</b> | <b>Yes</b>               | <b>This work</b> |

## References

1. P. Perfetti, C. Quaresima, C. Capasso, M. Capozzi, F. Evangelisti, F. Boscherini and F. Patella, Electronic properties of the precrystallization regime of germanium: A photoemission study, *Physical review. B, Condensed matter*, 1986, **33**, 6998-7005.
2. W. Guo, X. Liu, S. Han, Y. Liu, Z. Xu, M. Hong, J. Luo and Z. Sun, Room-Temperature Ferroelectric Material Composed of a Two-Dimensional Metal Halide Double Perovskite for X-ray Detection, *Angewandte Chemie International Edition*, 2020, **59**, 13879-13884.
3. C.-X. Qian, M.-Z. Wang, S.-S. Lu and H.-J. Feng, Fabrication of 2D perovskite (PMA)<sub>2</sub>PbI<sub>4</sub> crystal and Cu ion implantation improved x-ray detector, *Applied Physics Letters*, 2022, **120**, 011901.
4. C. Ma, L. Gao, Z. Xu, X. Li, X. Song, Y. Liu, T. Yang, H. Li, Y. Du, G. Zhao, X. Liu, M. G. Kanatzidis, S. F. Liu and K. Zhao, Centimeter-Sized 2D Perovskitoid Single Crystals for Efficient X-ray Photoresponsivity, *Chem. Mat.*, 2022, **34**, 1699-1709.
5. Y. Shen, Y. Liu, H. Ye, Y. Zheng, Q. Wei, Y. Xia, Y. Chen, K. Zhao, W. Huang and S. Liu, Centimeter-Sized Single Crystal of Two-Dimensional Halide Perovskites Incorporating Straight-Chain Symmetric Diammonium Ion for X-Ray Detection, *Angewandte Chemie International Edition*, 2020, **59**, 14896-14902.
6. Z. Xu, H. Wu, D. Li, W. Wu, L. Li and J. Luo, A lead-free I-based hybrid double perovskite (I-C<sub>4</sub>H<sub>8</sub>NH<sub>3</sub>)<sub>4</sub>AgBiI<sub>8</sub> for X-ray detection, *Journal of Materials Chemistry C*, 2021, **9**, 13157-13161.
7. C.-F. Wang, H. Li, M.-G. Li, Y. Cui, X. Song, Q.-W. Wang, J.-Y. Jiang, M.-M. Hua, Q. Xu, K. Zhao, H.-Y. Ye and Y. Zhang, Centimeter-Sized Single Crystals of Two-Dimensional Hybrid Iodide Double Perovskite (4,4-Difluoropiperidinium)<sub>4</sub>AgBiI<sub>8</sub> for High-Temperature Ferroelectricity and Efficient X-Ray Detection, *Adv. Funct. Mater.*, 2021, **31**, 2009457.
8. H. Tsai, F. Liu, S. Shrestha, K. Fernando, S. Tretiak, B. Scott, D. T. Vo, J. Strzalka and W. Nie, A sensitive and robust thin-film x-ray detector using 2D layered perovskite diodes, *Science Advances*, **6**, eaay0815.
9. Yukta, J. Ghosh, M. A. Afroz, S. Alghamdi, P. J. Sellin and S. Satapathi, Efficient and Highly Stable X-ray Detection and Imaging using 2D (BA)<sub>2</sub>PbI<sub>4</sub> Perovskite Single Crystals, *ACS Photonics*, 2022, **9**, 3529-3539.
10. Z. Xu, X. Liu, Y. Li, X. Liu, T. Yang, C. Ji, S. Han, Y. Xu, J. Luo and Z. Sun, Exploring Lead-Free Hybrid Double Perovskite Crystals of (BA)<sub>2</sub>CsAgBiBr<sub>7</sub> with Large Mobility-Lifetime Product toward X-Ray Detection, *Angewandte Chemie International Edition*, 2019, **58**, 15757-

15761.

11. Q. Fan, Y. Ma, S. You, H. Xu, W. Guo, Y. Liu, L. Tang, W. Li, J. Luo and Z. Sun, Dion–Jacobson Phase Perovskite Crystal Assembled by  $\pi$ -Conjugated Aromatic Spacer for X-Ray Detectors with an Ultralow Detection Limit, *Adv. Funct. Mater.*, 2024, **34**, 2312395.
12. D. Fu, Z. Chen, S. Wu, Y. Ma and X.-M. Zhang, Regulating the Stereoisomerism of Diammonium Cations to Construct Polar Dion-Jacobson Hybrid Perovskites for Self-Powered X-ray Detection, *Chem. Mat.*, 2024, **36**, 5284-5292.
13. J. Liu, B. Shabbir, C. Wang, T. Wan, Q. Ou, P. Yu, A. Tadich, X. Jiao, D. Chu, D. Qi, D. Li, R. Kan, Y. Huang, Y. Dong, J. Jasieniak, Y. Zhang and Q. Bao, Flexible, Printable Soft-X-Ray Detectors Based on All-Inorganic Perovskite Quantum Dots, *Adv. Mater. (Germany)*, 2019, **31**, 1901644.
14. X. Xu, W. Qian, S. Xiao, J. Wang, S. Zheng and S. Yang, Halide perovskites: A dark horse for direct X-ray imaging, *EcoMat*, 2020, **2**, e12064.
15. I.-H. Park, K. C. Kwon, Z. Zhu, X. Wu, R. Li, Q.-H. Xu and K. P. Loh, Self-Powered Photodetector Using Two-Dimensional Ferroelectric Dion–Jacobson Hybrid Perovskites, *J. Am. Chem. Soc.*, 2020, **142**, 18592-18598.
16. X. Xu, Y. Wu, Y. Zhang, X. Li, F. Wang, X. Jiang, S. Wu and S. Wang, Two-Dimensional Perovskite Single Crystals for High-Performance X-ray Imaging and Exploring MeV X-ray Detection, *ENERGY & ENVIRONMENTAL MATERIALS*, 2024, **7**, e12487.
17. H. Ye, Y. Peng, X. Shang, L. Li, Y. Yao, X. Zhang, T. Zhu, X. Liu, X. Chen and J. Luo, Self-Powered Visible-Infrared Polarization Photodetection Driven by Ferroelectric Photovoltaic Effect in a Dion–Jacobson Hybrid Perovskite, *Adv. Funct. Mater.*, 2022, **32**, 2200223.
